# Supplementary material
Source: Springer Nature journal article supplement (https://www.springermedizin.de/resource/supplementary/12885_2014_4636_MOESM13_ESM.pdf/9466914)

**A**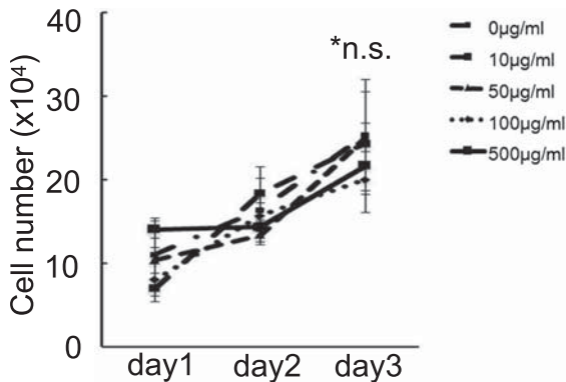**B**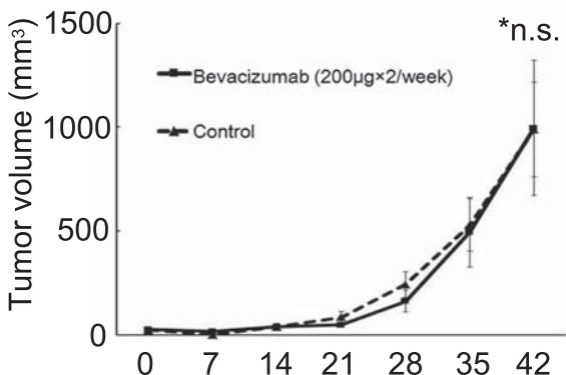

Supplement: MOESM13 [file 9466914]
